# Supplementary material for: Simple Point-of-Care Nucleic Acid Amplification Test for Rapid SARS-CoV-2 Infection Diagnosis
Source: MDPI journal article supplement (doi:10.3390/diagnostics13183001), 2023-09-20
Supplement: s1 [file s1]

## Supplementary data

**Table S1.** SARS CoV-2 wild-type and mutants obtained by the Korea Disease Control and Prevention Agency (KDCA).

| Pathogen   | NCCP No. | Genotype<br>(GSAID*) | Lineage   |
|------------|----------|----------------------|-----------|
| SARS-CoV-2 | 43346    | GV (wild type)       | B.1.177   |
| SARS-CoV-2 | 43381    | GRY                  | B.1.1.7   |
| SARS-CoV-2 | 43382    | GH                   | B.1.351   |
| SARS-CoV-2 | 43383    | GR                   | P.2       |
| SARS-CoV-2 | 43384    | GH                   | B.1.427   |
| SARS-CoV-2 | 43385    | GH                   | B.1.429   |
| SARS-CoV-2 | 43386    | G                    | B.1.525   |
| SARS-CoV-2 | 43387    | GH                   | B.1.526   |
| SARS-CoV-2 | 43388    | GR                   | P.1       |
| SARS-CoV-2 | 43389    | G                    | B.1.617.1 |
| SARS-CoV-2 | 43404    | G                    | B.1.620   |
| SARS-CoV-2 | 43405    | GK                   | B.1.617.2 |
| SARS-CoV-2 | 43407    | GH                   | B.1.621   |
| SARS-CoV-2 | 43408    | GRA                  | BA.1      |
| SARS-CoV-2 | 43411    | GRA                  | BA.1.1    |
| SARS-CoV-2 | 43412    | GRA                  | BA.2      |
| SARS-CoV-2 | 43423    | GRA                  | BA.2.12.1 |
| SARS-CoV-2 | 43424    | GRA                  | BA.2.3    |
| SARS-CoV-2 | 43425    | GRA                  | BA.4      |
| SARS-CoV-2 | 43426    | GRA                  | BA.5      |

\* GSAID (Global Initiative on Sharing All Influenza Data)

**Table S2.** The SARS-CoV-2 RT-LAMP primers used in this study.

| Primer set      | Name                 | Sequence (5'-3')                                                                      | $\mu\text{M}$ |
|-----------------|----------------------|---------------------------------------------------------------------------------------|---------------|
| Primer mix<br>A | RdRP F3              | CCG ATA AGT ATG TCC GCA AT                                                            | 4             |
|                 | RdRP B3              | GCT TCA GAC ATA AAA ACA TTG T                                                         | 4             |
|                 | RdRP FIP             | ATG CGT AAA ACT CAT TCA CAA AGT CCA ACA<br>CAG ACT TTA TGA GTG TC                     | 32            |
|                 | RdRP BIP             | TGA TAC TCT CTG ACG ATG CTG TTT AAA GTT CTT<br>TAT GCT AGC CAC                        | 32            |
|                 | RdRP LF              | TGT GTC AAC ATC TCT ATT TCT ATA G                                                     | 10            |
|                 | RdRP LB              | TCA ATA GCA CTT ATG CAT CTC AAG G                                                     | 4             |
|                 | RdRP LB_FAM<br>probe | [FAM]- CGG GCC CGT ACA AAG GGA ACA CCC ACA<br>CTC CGT CAA TAG CAC TTA TGC ATC TCA AGG | 6             |
|                 | Quencher probe       | GAG TGT GGG TGT TCC CTT TGT ACG GGC CCG-<br>BHQ1                                      | 8             |
| Primer mix<br>B | RdRP F3              | CCG ATA AGT ATG TCC GCA AT                                                            | 4             |
|                 | RdRP B3              | GCT TCA GAC ATA AAA ACA TTG T                                                         | 4             |
|                 | RdRP FIP biotin      | [Biotin]- ATG CGT AAA ACT CAT TCA CAA AGT CCA<br>ACA CAG ACT TTA TGA GTG TC           | 32            |
|                 | RdRP BIP biotin      | [Biotin]- TGA TAC TCT CTG ACG ATG CTG TTT AAA<br>GTT CTT TAT GCT AGC CAC              | 32            |
|                 | RdRP LF              | TGT GTC AAC ATC TCT ATT TCT ATA G                                                     | 10            |
|                 | RdRP LB_DIG<br>probe | [Digoxigenin]- TCA ATA GCA CTT ATG CAT CTC AAG G                                      | 10            |

**Table S3.** Results of Allplex™ SARS-CoV-2 Assay, SARS CoV-2 RT-LAMP and Rapid SARS CoV-2 RT-LAMP-LFA kit for 1 wild and 19 mutations of SARS CoV-2 test.

| SARS CoV-2<br>variants<br>(10 <sup>5</sup> PFU mL <sup>-1</sup> ) | NCCP<br>No. | Sensitivity                  |                  |                       |      |                                     |
|-------------------------------------------------------------------|-------------|------------------------------|------------------|-----------------------|------|-------------------------------------|
|                                                                   |             | Allplex™<br>SARS-CoV-2 Assay |                  | SARS CoV-2<br>RT-LAMP |      | Rapid SARS CoV-2<br>RT-LAMP-LFA kit |
|                                                                   |             | Ct <sup>1</sup>              | RFU <sup>2</sup> | Ct                    | RFU  | P/N <sup>3</sup>                    |
| Wild type                                                         | 43346       | 14.08                        | 7077             | 6.19                  | 4851 | P                                   |
| B.1.1.7                                                           | 43381       | 15.43                        | 11700            | 6.41                  | 5070 | P                                   |
| B.1.351                                                           | 43382       | 16.39                        | 11216            | 7.01                  | 4818 | P                                   |
| P.2                                                               | 43383       | 12.47                        | 12571            | 6.03                  | 4861 | P                                   |
| B.1.427                                                           | 43384       | 16.53                        | 12450            | 7.14                  | 4949 | P                                   |
| B.1.429                                                           | 43385       | 15.98                        | 12807            | 7.21                  | 4823 | P                                   |
| B.1.525                                                           | 43386       | 22.56                        | 12532            | 9.06                  | 5392 | P                                   |
| B.1.526                                                           | 43387       | 21.21                        | 11736            | 8.67                  | 4065 | P                                   |
| P.1                                                               | 43388       | 13.84                        | 11577            | 6.39                  | 4679 | P                                   |
| B.1.617.1                                                         | 43389       | 17.70                        | 5337             | 7.15                  | 4478 | P                                   |
| B.1.620                                                           | 43404       | 16.52                        | 6717             | 6.48                  | 4313 | P                                   |
| B.1.617.2                                                         | 43405       | 19.46                        | 2672             | 7.51                  | 4699 | P                                   |
| B.1.621                                                           | 43407       | 20.25                        | 5817             | 7.63                  | 5040 | P                                   |
| BA.1                                                              | 43408       | 14.09                        | 3608             | 5.77                  | 5434 | P                                   |
| BA.1.1                                                            | 43411       | 18.59                        | 3477             | 7.39                  | 4742 | P                                   |
| BA.2                                                              | 43412       | 18.52                        | 3319             | 7.66                  | 4422 | P                                   |
| BA.2.12.1                                                         | 43423       | 17.91                        | 3386             | 7.23                  | 4720 | P                                   |
| BA.2.3                                                            | 43424       | 21.65                        | 3717             | 8.60                  | 4636 | P                                   |
| BA.4                                                              | 43425       | 20.84                        | 3979             | 8.25                  | 4481 | P                                   |
| BA.5                                                              | 43426       | 23.36                        | 3314             | 9.22                  | 4279 | P                                   |

<sup>1</sup> Ct; Cycle threshold, <sup>2</sup> RFU; Relative fluorescence unit, <sup>3</sup> "P" and "N" indicate positive and negative of the reaction, respectively.

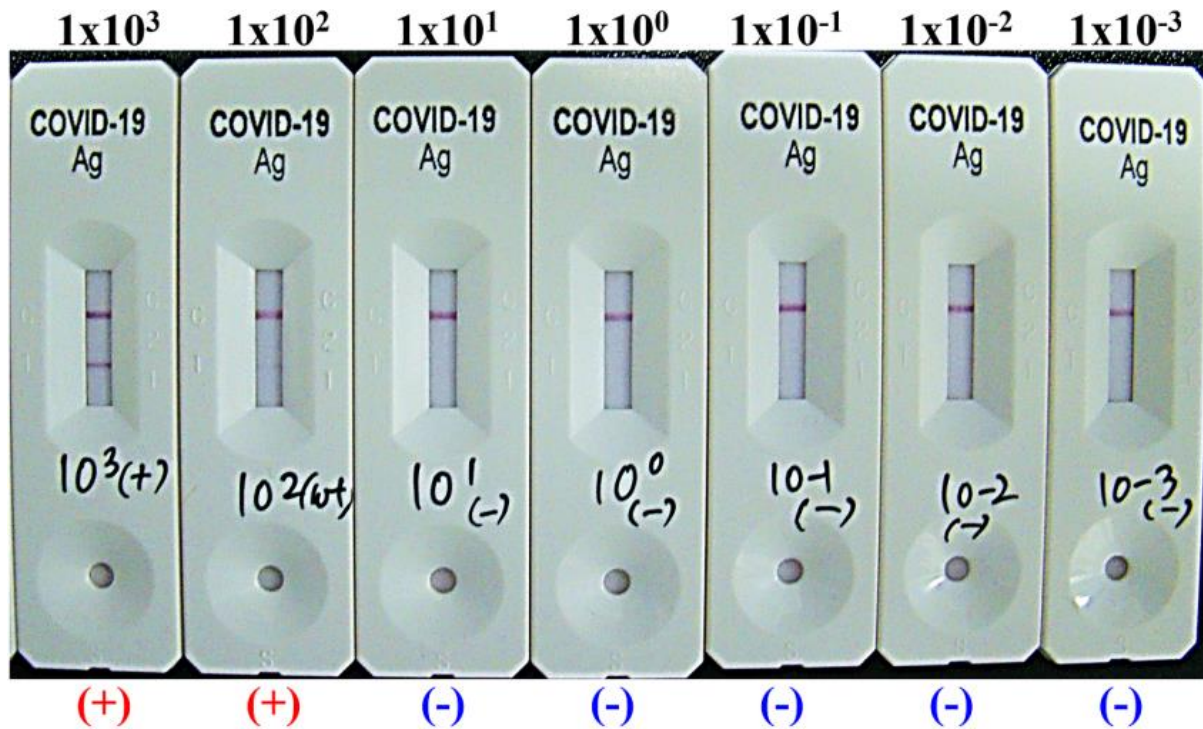

**Figure S1.** Limit of detection test of the rapid antigen kit for SARS CoV-2 (NCCP 43346, wild-type) spiked in normal clinical nasopharyngeal samples (range of  $10^3$ - $10^{-3}$  PFU ml<sup>-1</sup>). “+” and “-” indicate positive and negative of the reaction, respectively.

(A) Infected sample (n=92)

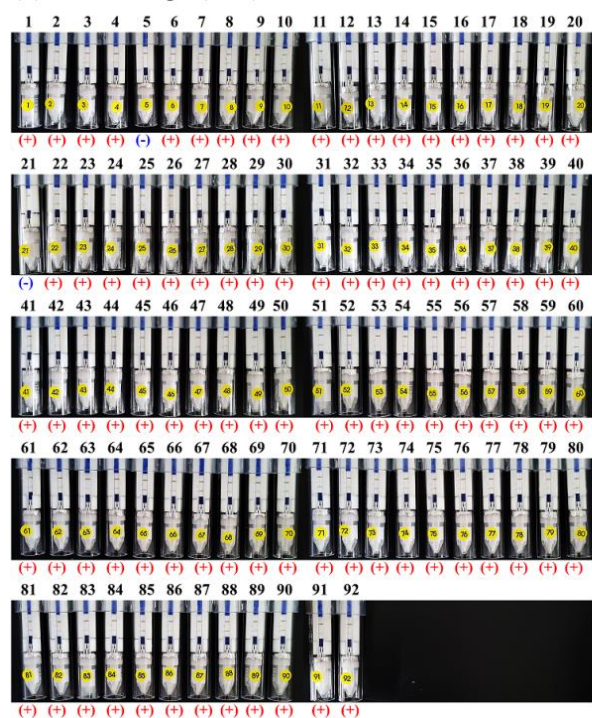

(B) Non-infected sample (n=100)

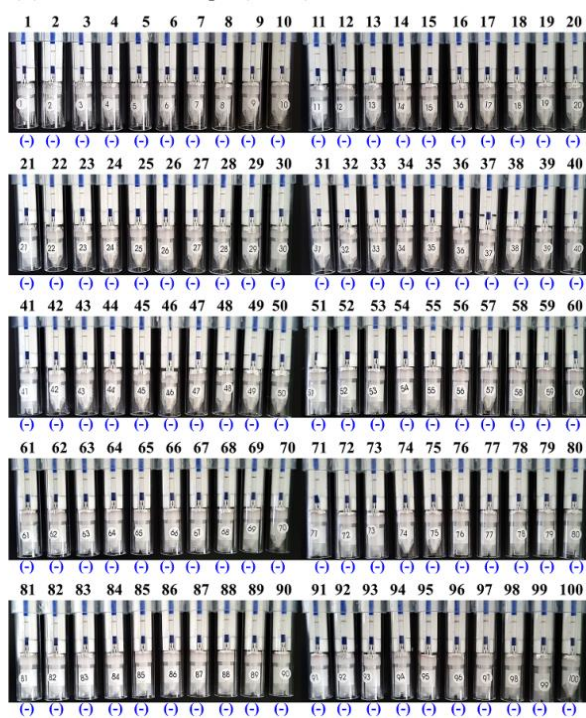

**Figure S2.** Results of clinical performance of the rapid SARS CoV-2 RT-LAMP-LFA kit for clinical samples. (A) 92 NP swab samples from individuals with SARS CoV-2. (B) 100 clinical NP swab samples from individuals without viral respiratory infections. “+” and “-” indicate positive and negative of the reaction, respectively.



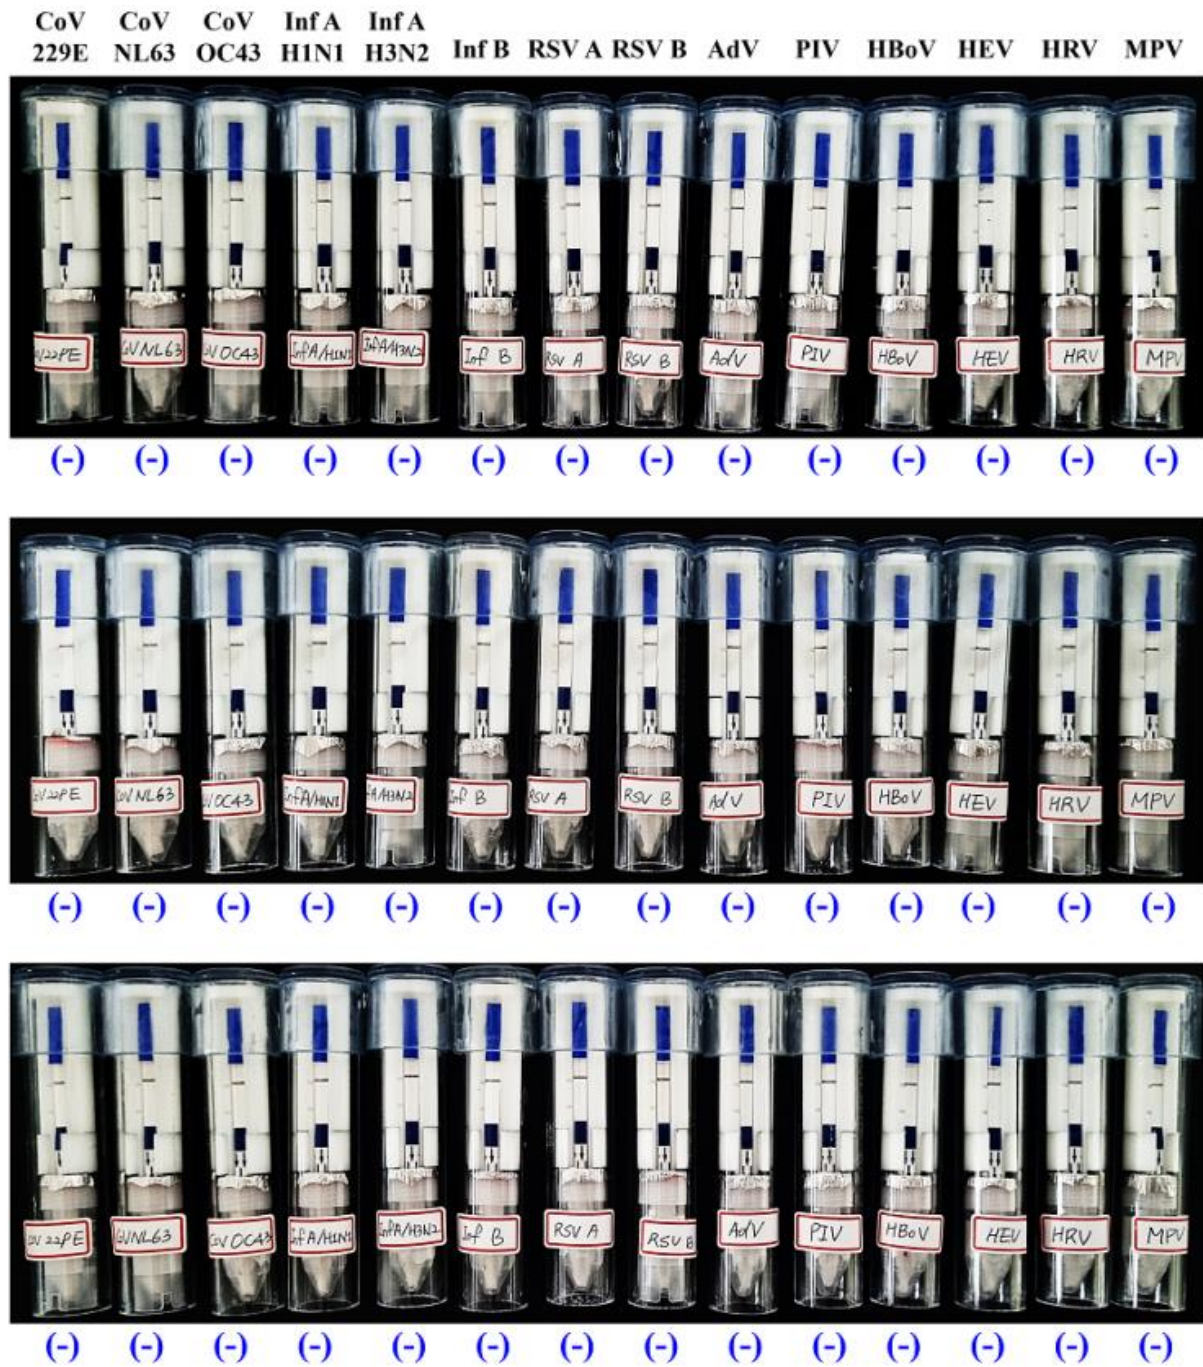

**Figure S3.** Results of Cross-reactivity of the rapid SARS CoV-2 RT-LAMP-LFA kit for SARS CoV-2 against other human infectious viruses. “+” and “-” indicate positive and negative of the reaction, respectively.

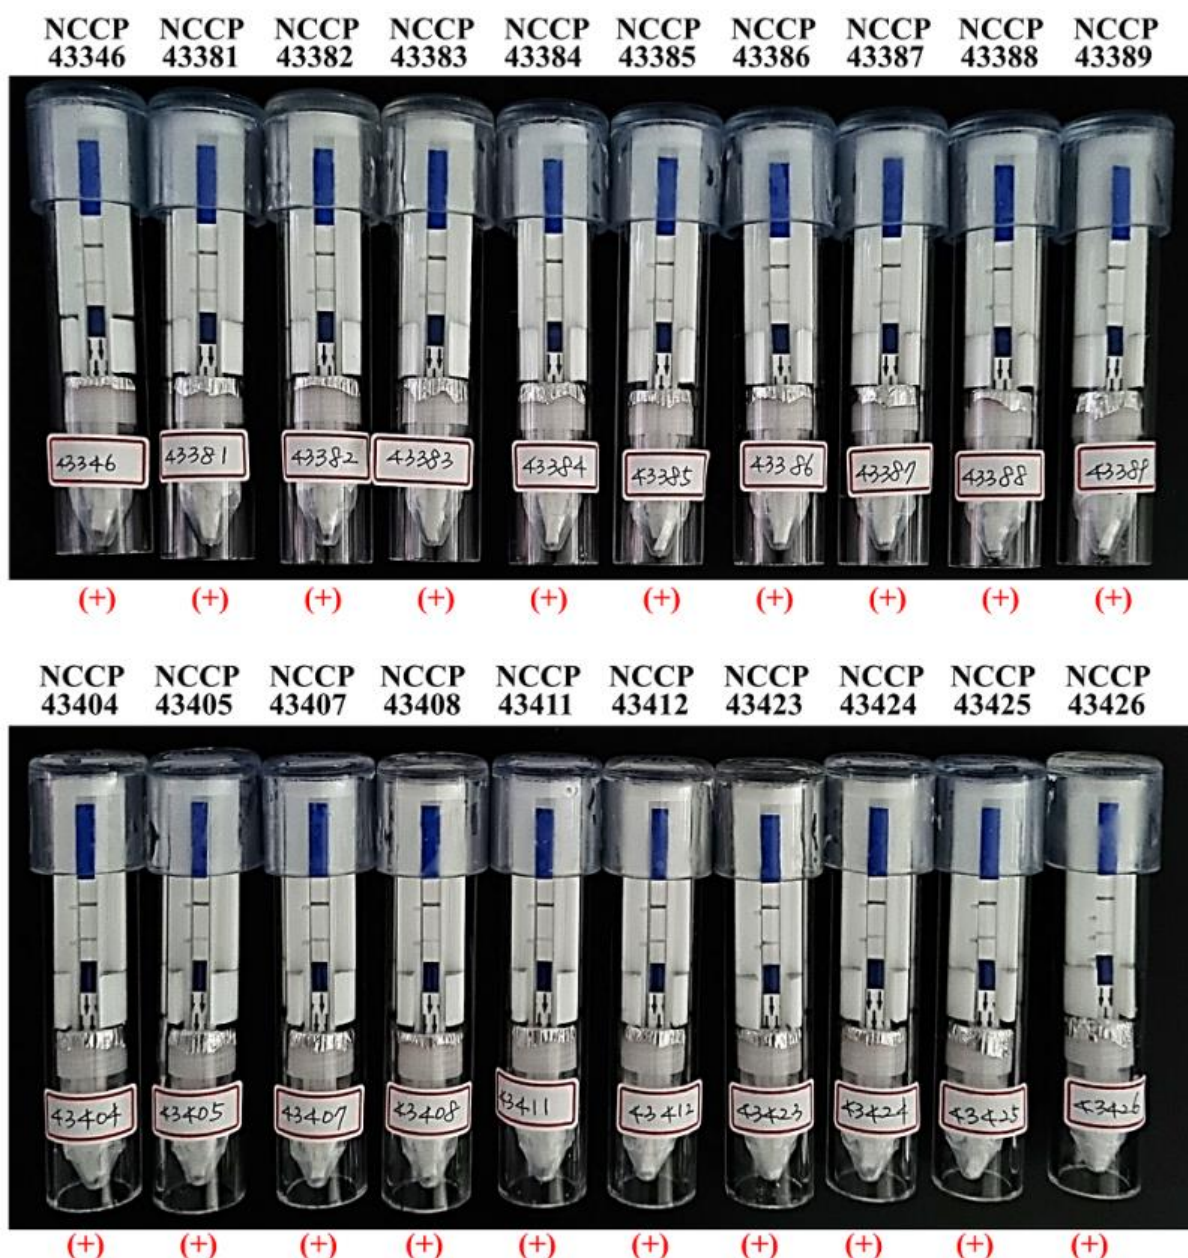

**Figure S4.** Results of the rapid SARS CoV-2 RT-LAMP-LFA kit for SARS CoV-2 for 1 wild and 19 mutations of SARS CoV-2 test. “+” and “-” indicate positive and negative of the reaction, respectively.

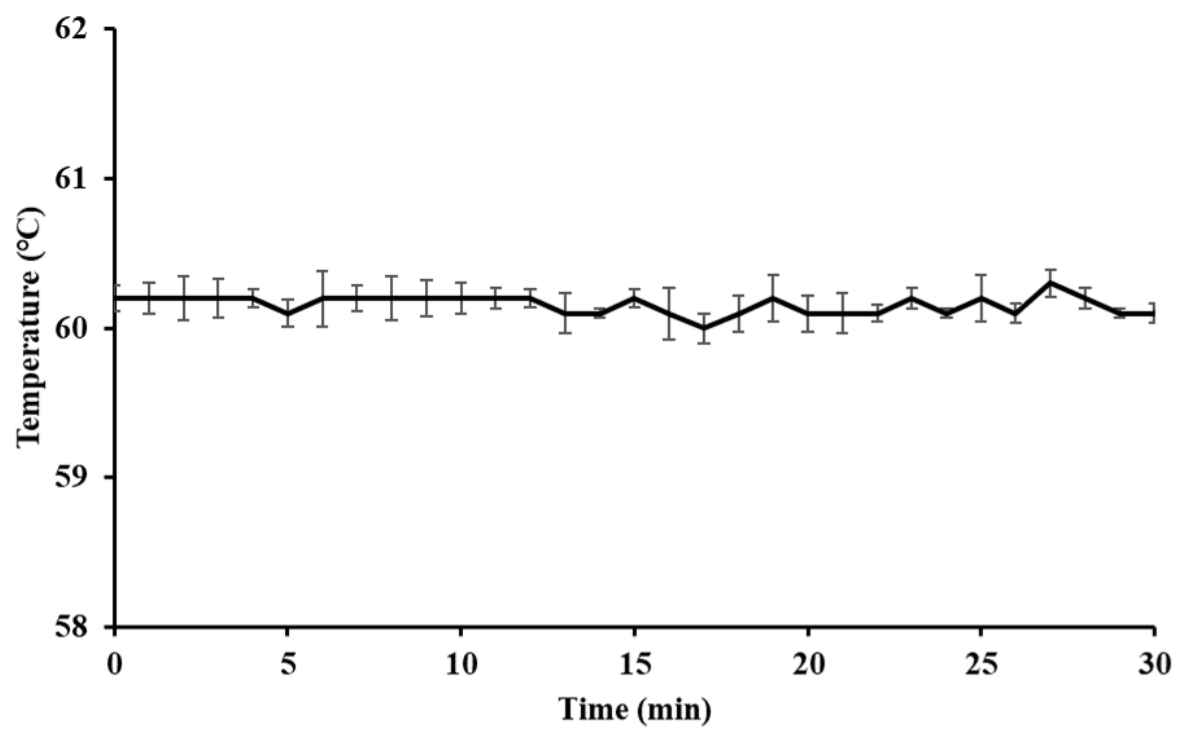

**Figure S5.** Temperature changes of the heat block. The tests were repeated 3 times.
